# Supplementary material
Source: PubMed Central journal article supplement (PMC8819981)
Supplement: ASN.2021040439SupplementaryData.pdf [file ASN.2021040439SupplementaryData.pdf]

Supplemental data.

Table of content:

7 Figures and 4 Tables.

Supplemental Data

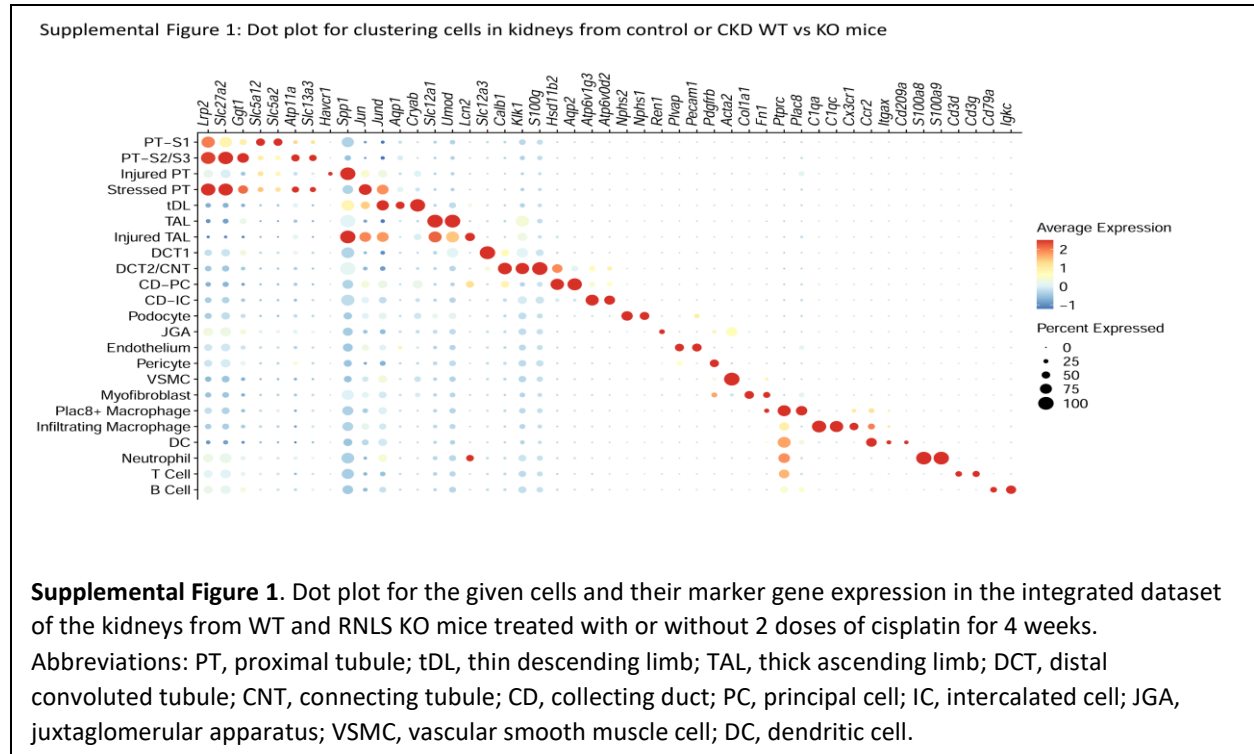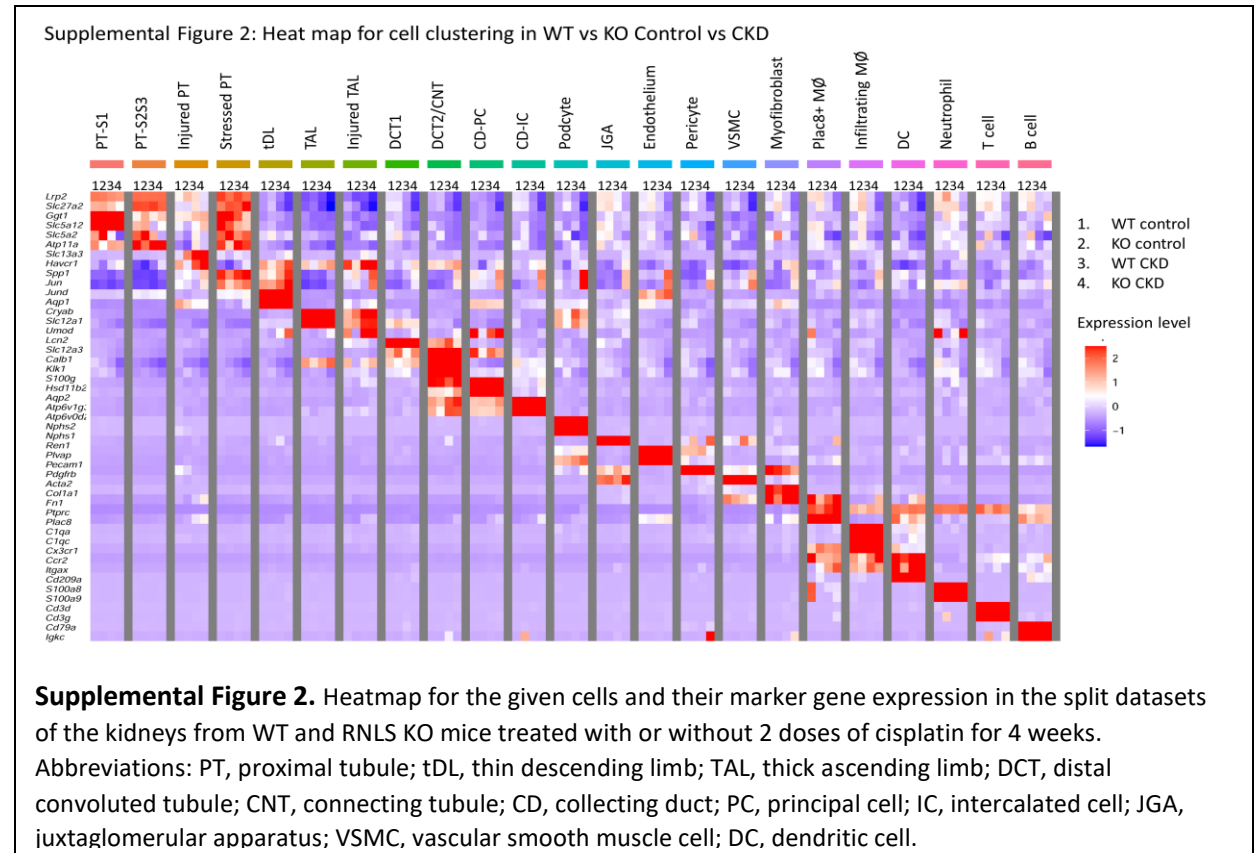

Supplemental Figure 3: IF for PEG in TKPTS cells

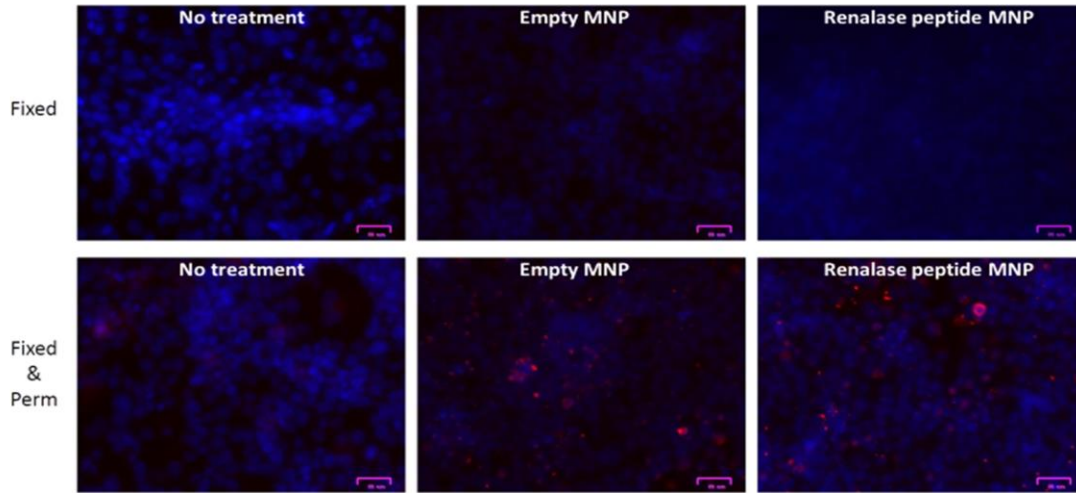

**Supplemental Figure 3.** Immunofluorescence staining for PEG in TKPTS cells treated with RP81MNP. Mouse proximal tubule cells TKPTS were cultured on coverslips and incubated without or with empty MNP or RP81MNP at 100ug/ml in cell growth medium for 24h. Cells were fixed in 4% paraformaldehyde for 20 min on ice. Some samples were permeabilized with ice-cold methanol for 5 min. Cells were stained with anti-PEG for MNP (red) and DAPI for nuclei (blue).

Supplemental Figure 4: RP81 protects WT mice from CP-induced CKD

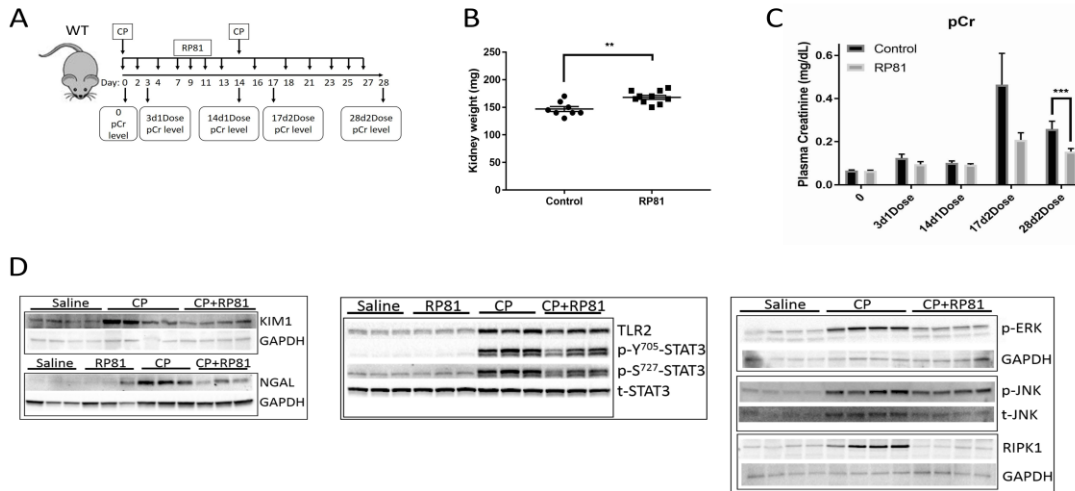

**Supplemental Figure 4.** RP81 protects WT mice from CP-induced CKD. A: schematic of treatment protocol: C57BL/6J mice were injected with 15mg/kg on day 0 and day 14. Renalase peptide RP81 (KIDVPWAGQYITSNPCIRFVSI DNKKRNIESS EIGP) was administrated to a separate group of mice at 4 mg/kg on days indicated; B: mouse kidney weight was measured at the end of the experiment; C: plasma creatinine levels of mice treated with CP (n=8) or CP plus RP81 (n=10) were measured at the time points indicated; D: Immunoblotting analysis of protein isolated from kidneys of mice treated with saline or 2 doses of cisplatin for 4 weeks without (CP) or with renalase peptide RP81 (CP+RP81) for KIM-1, NGAL, TLR2, STT3, ERK, JNK, and RIPK1.

Supplemental Figure 5: Dot plot for clustering cells in kidneys from RNLS KO CKD mice treated with control or RP81MNP

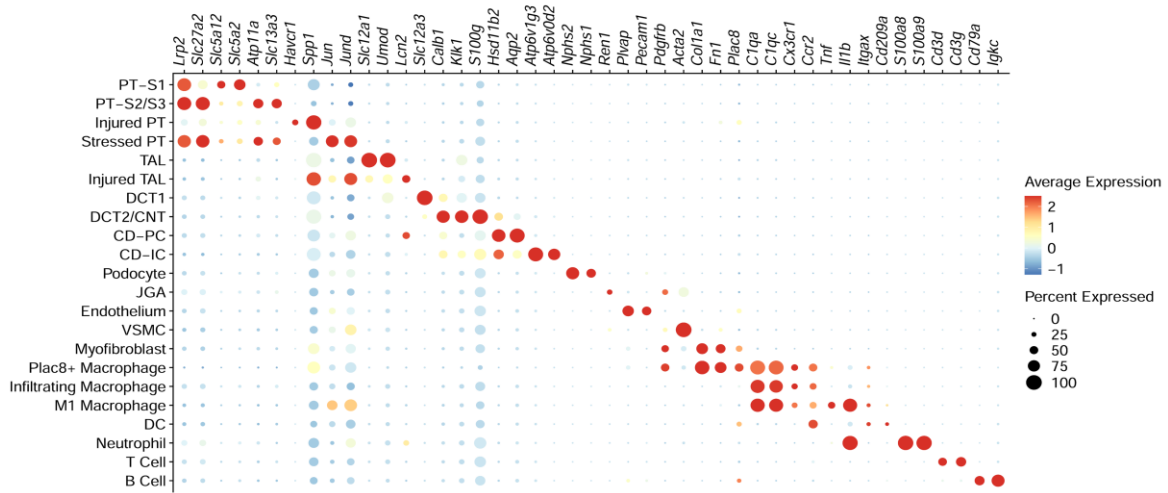

**Supplemental Figure 5.** Dot plot for the given cells and their marker gene expression in the integrated dataset of the kidneys from RNLS KO CKD mice treated with control or RP81MNP. Abbreviations: PT, proximal tubule; TAL, thick ascending limb; DCT, distal convoluted tubule; CNT, connecting tubule; CD, collecting duct; PC, principal cell; IC,

Supplemental Figure 6: Heat map for clustering cells in kidneys from RNLS KO CKD mice treated with control or RP81MNP

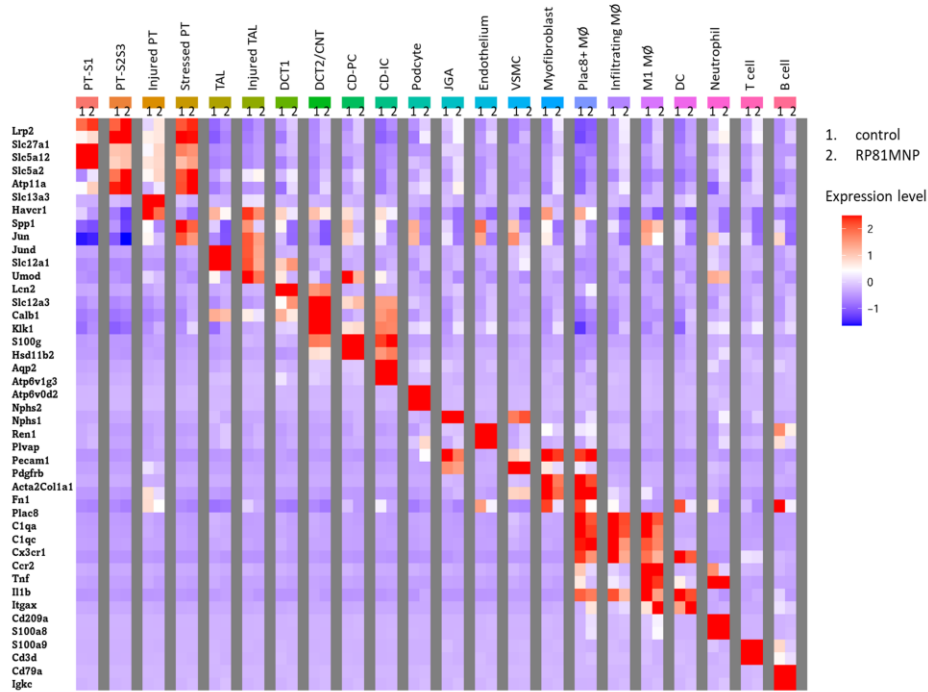

**Supplemental Figure 6.** Heatmap for the given cells and their marker gene expression in the split datasets of the kidneys from RNLS KO CKD mice treated with control or RP81MNP. Abbreviations: PT, proximal tubule; tDL, thin descending limb; TAL, thick ascending limb; DCT, distal convoluted tubule; CNT, connecting tubule; CD, collecting duct; PC, principal cell; IC, intercalated cell; JGA, juxtaglomerular apparatus; VSMC, vascular smooth muscle cell; DC, dendritic cell.

Supplemental Figure 7: Gene expression of KIM-1, NGAL, and Spp1 in kidneys from WT and KO mice

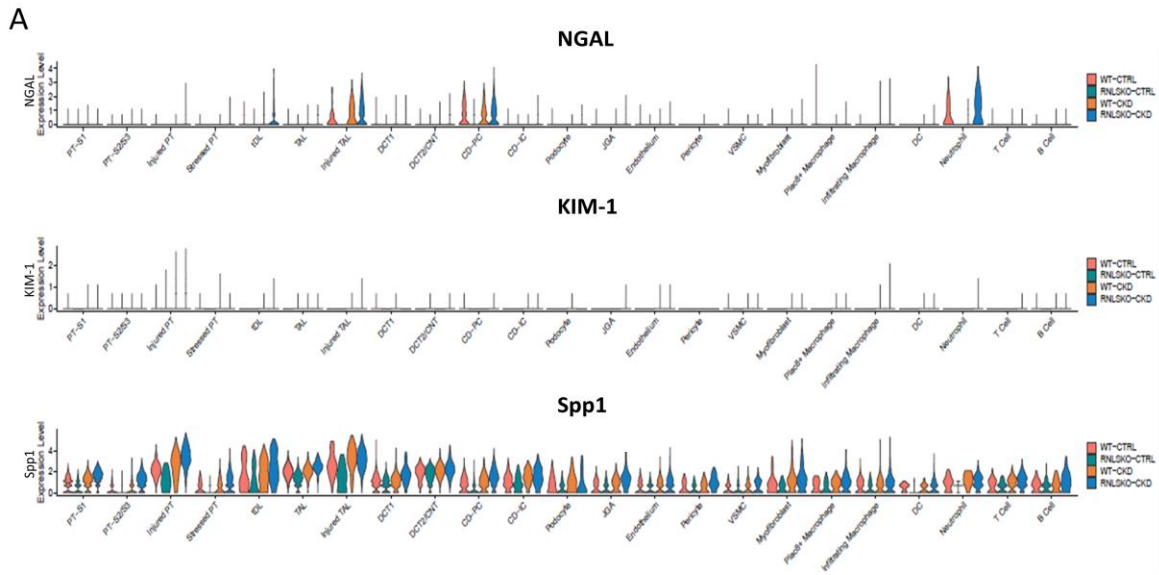

**Supplemental Figure 7A.** Violin plots of NGAL, KIM-1, and Spp1 gene expression in the split datasets of the kidneys from WT and RNLS KO mice treated with or without 2 doses of cisplatin for 4 weeks (A) and in the split datasets of the kidneys from RNLS KO CKD mice treated with control or RP81MNP

Supplemental Figure 7: Gene expression of KIM-1, NGAL, and Spp1 in kidneys from KO with and without RP81-MNP models of this study

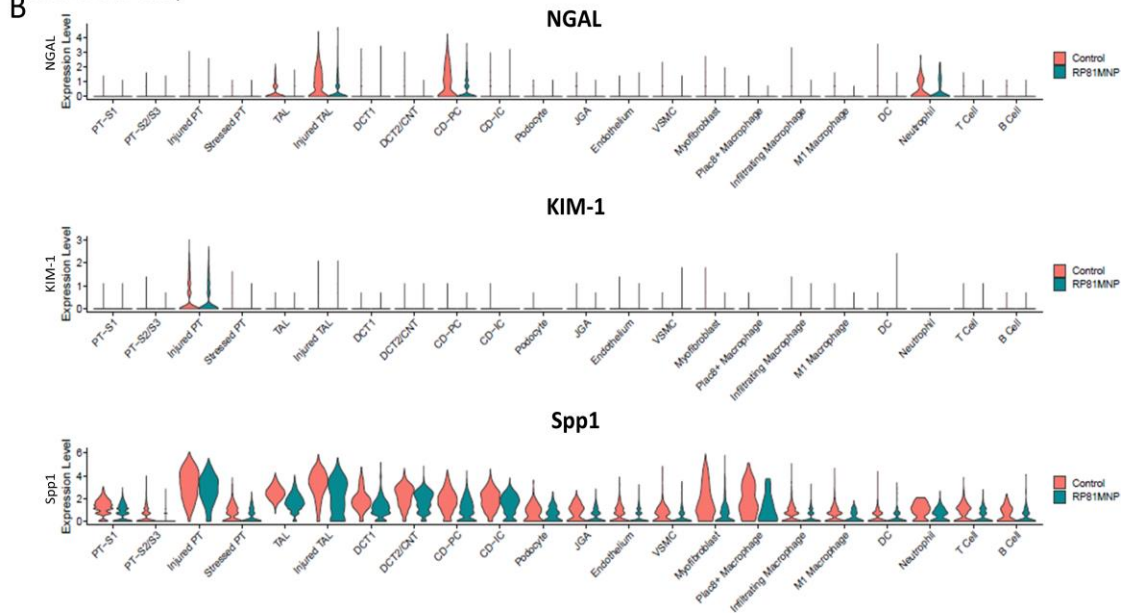

**Supplemental Figure 7B.** Abbreviations: PT, proximal tubule; tDL, thin descending limb; TAL, thick ascending limb; DCT, distal convoluted tubule; CNT, connecting tubule; CD, collecting duct; PC, principal cell; IC, intercalated cell; JGA, juxtaglomerular apparatus; VSMC, vascular smooth muscle cell; DC, dendritic cell.

**Supplemental Table 1: Antibodies used for this study**

| Antigen Name                             | Abbreviations | Resource                                  | Clone # / Catalog # | Applicatio dilution         |
|------------------------------------------|---------------|-------------------------------------------|---------------------|-----------------------------|
| Renalase                                 | RNLS          | in house                                  | m28                 | Immunoblotting: 0.25ug/ml   |
| glyceraldehyde 3 phosphate dehydrogenase | GAPDH         | Cell Signaling Technologies (Danvers, MA) | 2118                | Immunoblotting: 1:2,000     |
| Toll-like receptor 2                     | TLR2          | Cell Signaling Technologies (Danvers, MA) | 13744               | Immunoblotting: 1:1,000     |
| phospho-p44/42 Early response kinase     | p-Erk         | Cell Signaling Technologies (Danvers, MA) | 4370                | Immunoblotting: 1:2,000     |
| total Early response kinase              | t-Erk         | Cell Signaling Technologies (Danvers, MA) | 4695                | Immunoblotting: 1:2,000     |
| phospho-Tyr705-STAT3                     | p-Y-STAT3     | Cell Signaling Technologies (Danvers, MA) | 9145                | Immunoblotting: 1:1,000     |
| phospho-Ser727-STAT3                     | p-S-STAT3     | Cell Signaling Technologies (Danvers, MA) | 9134                | Immunoblotting: 1:1,000     |
| total STAT3                              | t-STAT3       | Cell Signaling Technologies (Danvers, MA) | 4904                | Immunoblotting: 1:1,000     |
| phospho-Thr183/Tyr185-SAPK/JNK           | p-JNK         | Cell Signaling Technologies (Danvers, MA) | 4668                | Immunoblotting: 1:1,000     |
| total JNK                                | t-JNK         | Cell Signaling Technologies (Danvers, MA) | 9252                | Immunoblotting: 1:1,000     |
| receptor-interacting protein             | RIPK-1        | Cell Signaling Technologies (Danvers, MA) | 3493                | Immunoblotting: 1:1,000     |
| kidney injury molecule-1                 | KIM-1         | R&D System (Minneapolis, MN)              | AF1817              | Immunoblotting: 1:500       |
| Lipocalin-2 / NGAL                       | NGAL          | R&D System (Minneapolis, MN)              | AF1857              | Immunoblotting: 1:500       |
| Polyethylene glycol                      | PEG           | Abcam (Cambridge, MA)                     | ab51257             | Immunohistochemistry: 1:200 |
| Alexa Fluor 647 labeled goat anti-rabbit |               | Abcam (Cambridge, MA)                     | ab150079            | Immunohistochemistry: 1:200 |
| Anti-rabbit IgG, HRP-linked Antibody     |               | Cell Signaling Technologies (Danvers, MA) | 7074                | Immunoblotting: 1:2,000     |
| Anti-mouse IgG, HRP-linked Antibody      |               | Cell Signaling Technologies (Danvers, MA) | 7076                | Immunoblotting: 1:2,000     |
| Anti-rat IgG, HRP-linked Antibody        |               | Cell Signaling Technologies (Danvers, MA) | 7077                | Immunoblotting: 1:2,000     |
| Anti-Goat IgG, HRP conjugate             |               | Sigma-Aldrich (St. Louis, MO)             | AP180P              | Immunoblotting: 1:5,000     |

**Supplemental Table 1.** List of Antibodies used in this study.

**Supplemental Table 2**

Supplemental Table 2. Human subject characteristics, eGFR, serum creatinine, KIM-1, and RNLS levels

| Subject # | Gender | Age | Cisplatin Tx (days) | BW (kg) | eGFR (ml/min/1.73m <sup>2</sup> ) | sCr (mg/dL) | KIM-1 (pg/ml) | RNLS (ug/ml) |
|-----------|--------|-----|---------------------|---------|-----------------------------------|-------------|---------------|--------------|
| 1         | M      | 68  | 0                   | 69.9    | >60                               | 0.93        | 14.86         | 6.26         |
|           |        |     | 1                   | 71.5    |                                   |             | 23.75         | 5.74         |
|           |        |     | 2                   | 73.1    |                                   |             | 40.14         | 5.58         |
|           |        |     | 14                  | 66.9    | 57                                | 1.25        | 420.42        | 4.71         |
| 2         | M      | 51  | 0                   | 110.9   | >60                               | 0.90        | 50.97         | 4.96         |
|           |        |     | 1                   | 114.8   |                                   |             | 56.81         | 5.66         |
|           |        |     | 2                   | 114.3   |                                   |             | 56.25         | 5.26         |
|           |        |     | 14                  | 110.2   |                                   | 0.90        | 350.42        | 6.51         |
| 3         | M      | 57  | 0                   | 67.22   | >60                               | 0.85        | 22.64         | 4.34         |
|           |        |     | 1                   |         |                                   |             | 40.69         | 5.40         |
|           |        |     | 2                   | 70.4    |                                   |             | 55.14         | 7.82         |
|           |        |     | 14                  | 64.7    | >60                               | 0.89        | 194.03        | 8.31         |
| 4         | M      | 50  | 0                   | 76.9    | >60                               | 0.90        | 44.58         | 11.21        |
|           |        |     | 1                   |         |                                   |             | 44.03         | 12.47        |
|           |        |     | 2                   |         |                                   |             | 56.53         | 5.50         |
|           |        |     | 14                  | 74.9    | >60                               | 0.91        | 230.69        | 12.58        |
| 5         | F      | 60  | 0                   | 87.6    | >60                               | 0.76        | 44.31         | 2.52         |
|           |        |     | 1                   |         |                                   |             | 62.64         | 6.98         |
|           |        |     | 2                   | 86.2    |                                   |             | 85.69         | 6.44         |
|           |        |     | 14                  | 85.2    | >60                               | 0.89        | 225.14        | 6.21         |
| 6         | M      | 64  | 0                   | 105.2   | >60                               | 0.92        | 87.92         | 12.99        |
|           |        |     | 1                   |         |                                   |             | 174.58        | 11.39        |
|           |        |     | 2                   | 106.3   |                                   |             | 152.36        | 11.05        |
|           |        |     | 14                  | 107.2   | >60                               | 0.91        | 209.86        | 8.88         |
| 7         | M      | 48  | 0                   | 108     | >60                               | 0.59        | 52.92         | 11.96        |
|           |        |     | 1                   |         |                                   |             | 54.58         | 14.60        |
|           |        |     | 2                   | 106.7   |                                   |             | 67.92         | 12.80        |
|           |        |     | 14                  | 105.2   | >60                               | 0.97        | 880.97        | 9.81         |
| 8         | F      | 59  | 0                   | 49.6    | >60                               | 0.59        | 127.36        | 11.21        |
|           |        |     | 2                   |         |                                   |             | 128.75        | 8.52         |
|           |        |     | 14                  | 48.9    | >60                               | 0.65        | 1029.58       | 5.80         |
| 9         | M      | 45  | 0                   | 89.1    | >60                               | 0.65        | 42.36         | 10.17        |
|           |        |     | 1                   |         |                                   |             | 44.58         | 8.83         |
|           |        |     | 2                   | 52      | >60                               | 0.68        | 62.08         | 7.75         |
|           |        |     | 14                  | 87.2    | >60                               | 0.84        | 549.03        | 9.53         |
| 10        | M      | 57  | 0                   | 99.1    | >60                               | 0.74        | 44.58         | 20.51        |
|           |        |     | 1                   |         |                                   |             | 52.64         | 18.59        |
|           |        |     | 2                   | 89.3    |                                   |             | 67.64         | 15.96        |
|           |        |     | 14                  | 95.7    | >60                               | 1.20        | 698.75        | 12.69        |
| 11        | M      | 61  | 0                   | 94.3    | >60                               | 0.75        | 134.31        | 10.62        |
|           |        |     | 1                   |         | >60                               | 0.69        | 192.64        | 10.85        |
|           |        |     | 2                   | 100.5   | >60                               | 0.71        | 230.42        | 8.89         |
|           |        |     | 14                  | 89.1    | >60                               | 0.89        | 414.86        | 5.19         |

**Supplemental Table 2.** Human subject characteristics and serum levels of eGFR, KIM-1, creatinine, and RNLS

Supplemental Table 3: Cell numbers in each cluster and % of cells in kidneys of WT vs. RNLS KO mice treated with or without 2 doses of cisplatin for 4 weeks

Supplemental Table 3: Cell numbers in each cluster and % of cells in kidneys of WT vs. RNLS KO mice treated with c

|                         | WT-CTRL |       | RNLSKO-CTRL |       | WT-CKD |       | RNLSKO-CKD |       |
|-------------------------|---------|-------|-------------|-------|--------|-------|------------|-------|
| PT-S1                   | 2838    | 30.8% | 3742        | 26.6% | 2473   | 26.1% | 3071       | 20.6% |
| PT-S2/S3                | 1370    | 14.9% | 3800        | 27.1% | 1787   | 18.8% | 1201       | 8.0%  |
| Injured PT              | 89      | 1.0%  | 45          | 0.3%  | 223    | 2.3%  | 1486       | 10.0% |
| Stressed PT             | 125     | 1.4%  | 230         | 1.6%  | 286    | 3.0%  | 1542       | 10.3% |
| tDL                     | 282     | 3.1%  | 334         | 2.4%  | 249    | 2.6%  | 560        | 3.8%  |
| TAL                     | 429     | 4.7%  | 880         | 6.3%  | 489    | 5.2%  | 346        | 2.3%  |
| Injured TAL             | 30      | 0.3%  | 29          | 0.2%  | 96     | 1.0%  | 1190       | 8.0%  |
| DCT1                    | 492     | 5.3%  | 680         | 4.8%  | 354    | 3.7%  | 90         | 0.6%  |
| DCT2/CNT                | 596     | 6.5%  | 958         | 6.8%  | 401    | 4.2%  | 263        | 1.8%  |
| CD-PC                   | 448     | 4.9%  | 537         | 3.8%  | 366    | 3.9%  | 548        | 3.7%  |
| CD-IC                   | 204     | 2.2%  | 155         | 1.1%  | 182    | 1.9%  | 180        | 1.2%  |
| Podocyte                | 64      | 0.7%  | 162         | 1.2%  | 43     | 0.5%  | 42         | 0.3%  |
| JGA                     | 215     | 2.3%  | 342         | 2.4%  | 213    | 2.2%  | 166        | 1.1%  |
| Endothelium             | 916     | 10.0% | 1016        | 7.2%  | 930    | 9.8%  | 1191       | 8.0%  |
| Pericyte                | 63      | 0.7%  | 206         | 1.5%  | 63     | 0.7%  | 31         | 0.2%  |
| VSMC                    | 287     | 3.1%  | 256         | 1.8%  | 221    | 2.3%  | 294        | 2.0%  |
| Myofibroblast           | 92      | 1.0%  | 39          | 0.3%  | 146    | 1.5%  | 464        | 3.1%  |
| Plac8+ Macrophage       | 62      | 0.7%  | 52          | 0.4%  | 90     | 0.9%  | 178        | 1.2%  |
| Infiltrating Macrophage | 279     | 3.0%  | 182         | 1.3%  | 405    | 4.3%  | 1141       | 7.6%  |
| DC                      | 27      | 0.3%  | 72          | 0.5%  | 96     | 1.0%  | 460        | 3.1%  |
| Neutrophil              | 74      | 0.8%  | 14          | 0.1%  | 25     | 0.3%  | 75         | 0.5%  |
| T Cell                  | 118     | 1.3%  | 175         | 1.2%  | 228    | 2.4%  | 326        | 2.2%  |
| B Cell                  | 103     | 1.1%  | 142         | 1.0%  | 124    | 1.3%  | 82         | 0.5%  |
| Sum                     | 9203    |       | 14048       |       | 9490   |       | 14927      |       |

**Supplemental Table 3.** Single cell RNA sequencing of kidneys from WT and RNLS KO mice treated with or without 2 doses of cisplatin for 4 weeks: cell numbers in each cluster and % of cells in the kidneys.

Supplemental Table 4: Cell numbers in each cluster and % of cells in kidneys of RNLS KO mice treated with control or RP81

Supplemental Table 3: Cell numbers in each cluster and % of cells in

|                         | Control |       | RP81MNP |       |
|-------------------------|---------|-------|---------|-------|
| PT-S1                   | 1425    | 8.5%  | 4188    | 18.6% |
| PT-S2/S3                | 2480    | 14.8% | 4148    | 18.4% |
| Injured PT              | 1113    | 6.7%  | 497     | 2.2%  |
| Stressed PT             | 952     | 5.7%  | 722     | 3.2%  |
| TAL                     | 555     | 3.3%  | 960     | 4.3%  |
| Injured TAL             | 814     | 4.9%  | 704     | 3.1%  |
| DCT1                    | 108     | 0.6%  | 607     | 2.7%  |
| DCT2/CNT                | 604     | 3.6%  | 1348    | 6.0%  |
| CD-PC                   | 523     | 3.1%  | 1274    | 5.7%  |
| CD-IC                   | 351     | 2.1%  | 863     | 3.8%  |
| Podocyte                | 110     | 0.7%  | 154     | 0.7%  |
| JGA                     | 229     | 1.4%  | 391     | 1.7%  |
| Endothelium             | 1250    | 7.5%  | 2540    | 11.3% |
| VSMC                    | 375     | 2.2%  | 378     | 1.7%  |
| Myofibroblast           | 974     | 5.8%  | 662     | 2.9%  |
| Plac8+ Macrophage       | 177     | 1.1%  | 36      | 0.2%  |
| Infiltrating Macrophage | 2082    | 12.4% | 1618    | 7.2%  |
| M1 Macrophage           | 1131    | 6.8%  | 86      | 0.4%  |
| DC                      | 442     | 2.6%  | 359     | 1.6%  |
| Neutrophil              | 76      | 0.5%  | 146     | 0.6%  |
| T Cell                  | 827     | 4.9%  | 604     | 2.7%  |
| B Cell                  | 135     | 0.8%  | 258     | 1.1%  |
| Sum                     | 16733   |       | 22543   |       |

**Supplemental Table 4.** Single cell RNA sequencing of kidneys from RNLS KO mice treated with control or RP81MNP and 2 doses of cisplatin for 4 weeks: cell numbers in each cluster and % of cells in the kidneys.
